# Supplementary material for: Transcriptomic Analysis of Flower Color Changes in Impatiens uliginosa in Response to Copper Stress
Source: MDPI journal article supplement (doi:10.3390/horticulturae10040412), 2024-04-19
Supplement: s1 [file s1]

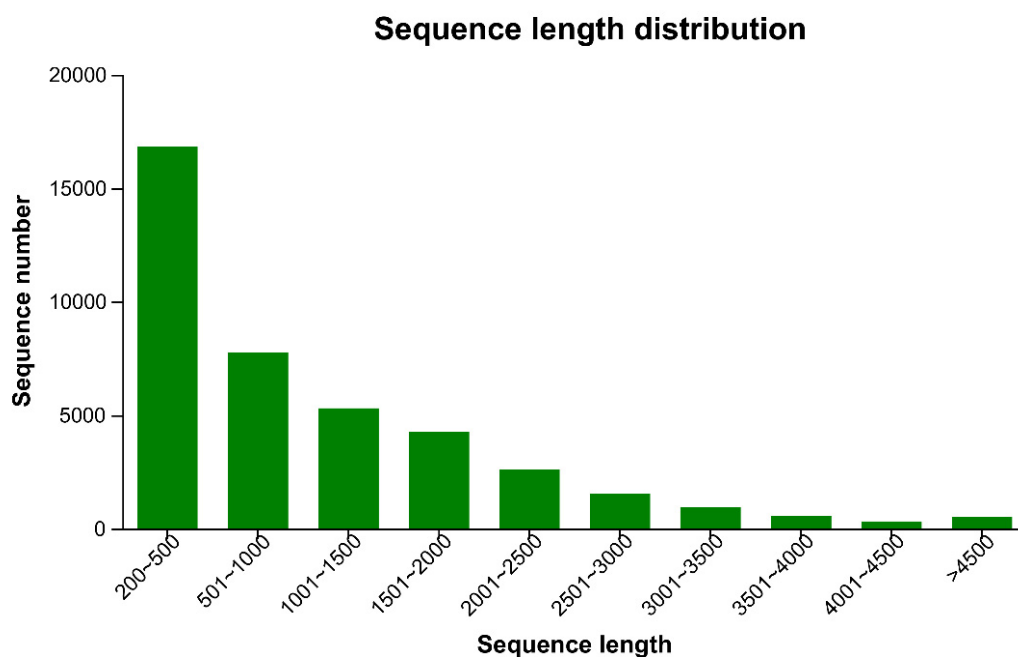

(a)

### GO enrichment analysis(Cu0vsCu10vsCu20)

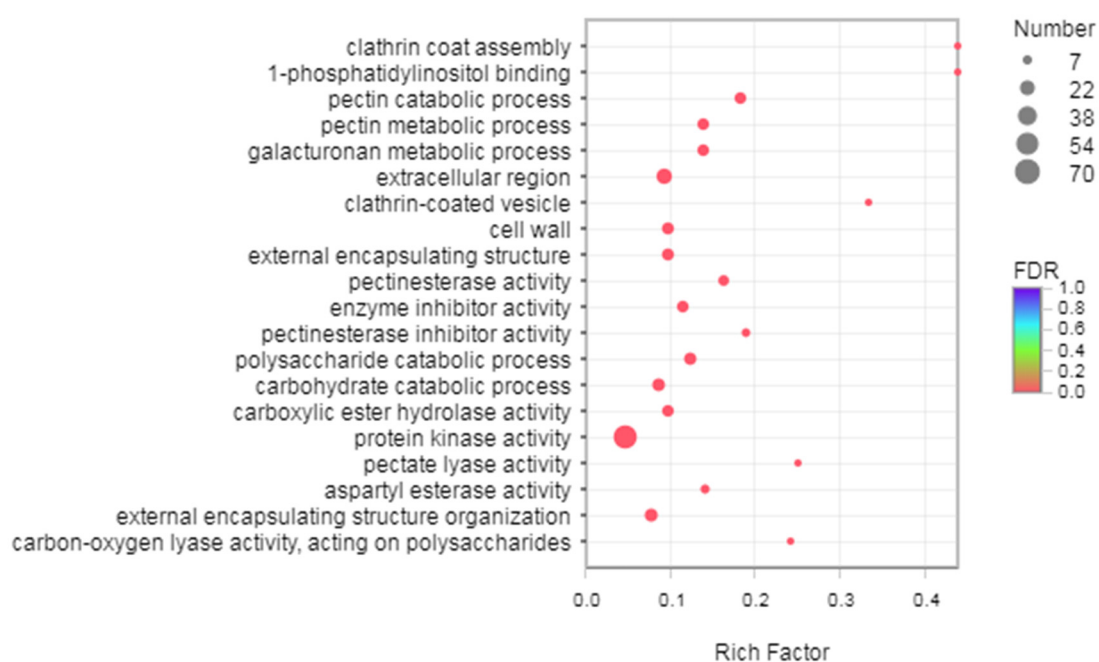

(b)

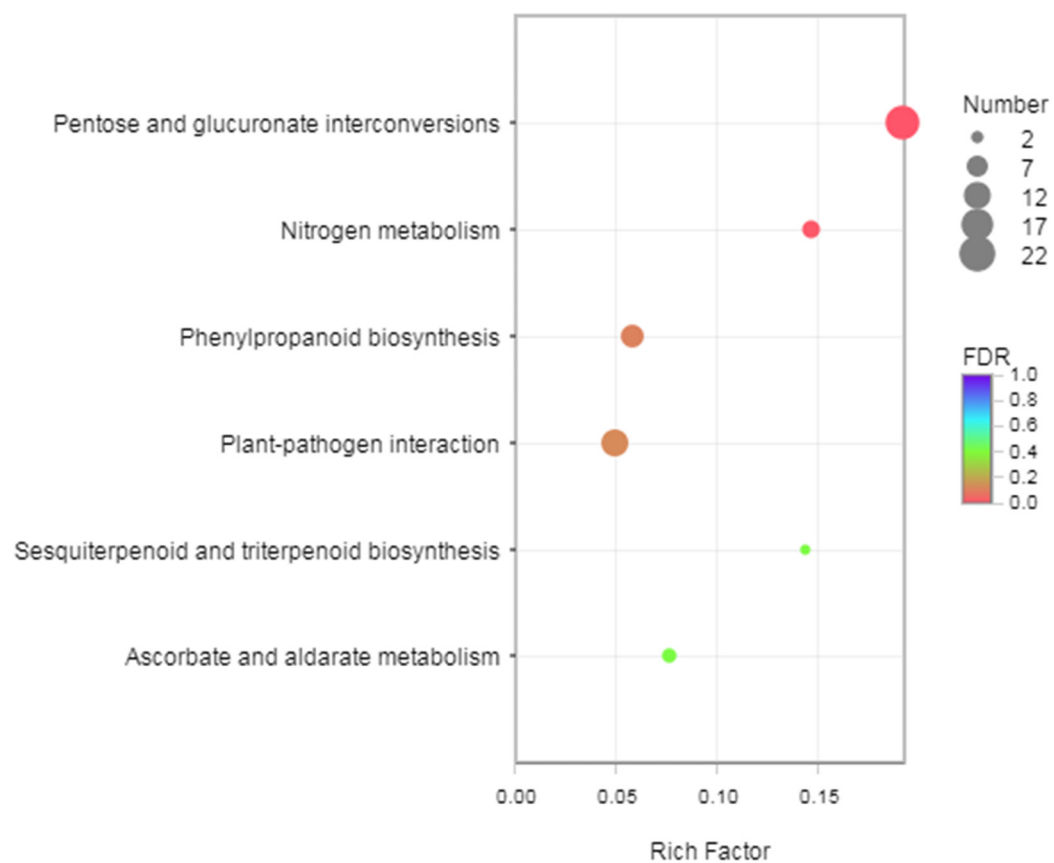

(c)

Figure S1. (a) Length distribution of unigenes; (b) Bubble chart of go enrichment of differential genes; (c) KEGG Pathway enrichment of differentially expressed genes.
