# Supplementary material for: Transcriptomic Analysis of Flower Color Changes in Impatiens uliginosa in Response to Copper Stress
Source: MDPI journal article supplement (doi:10.3390/horticulturae10040412), 2024-04-19
Supplement: s1 [file s1]

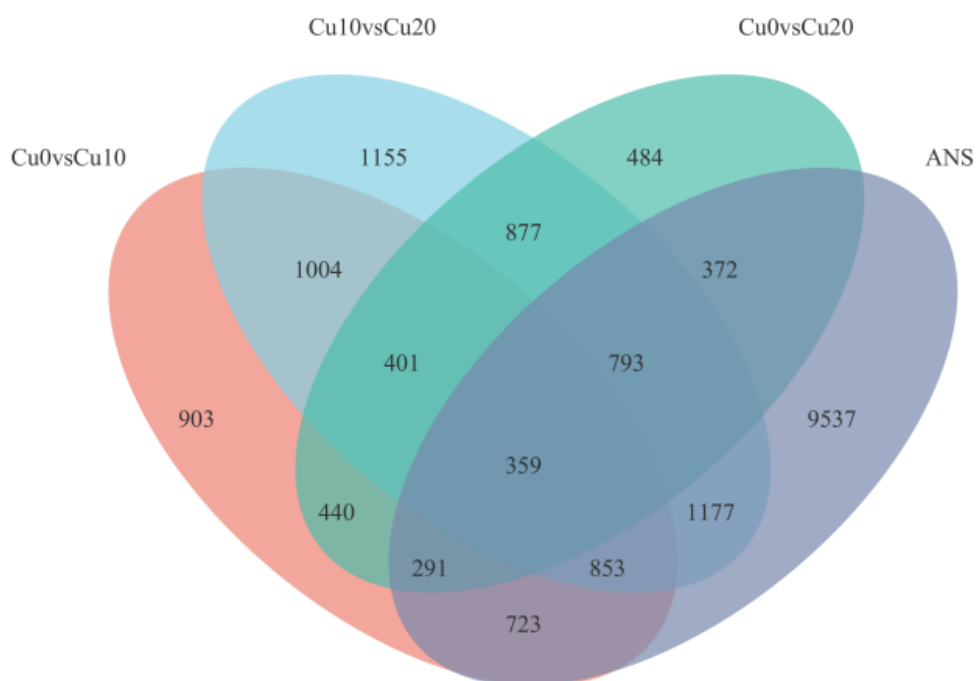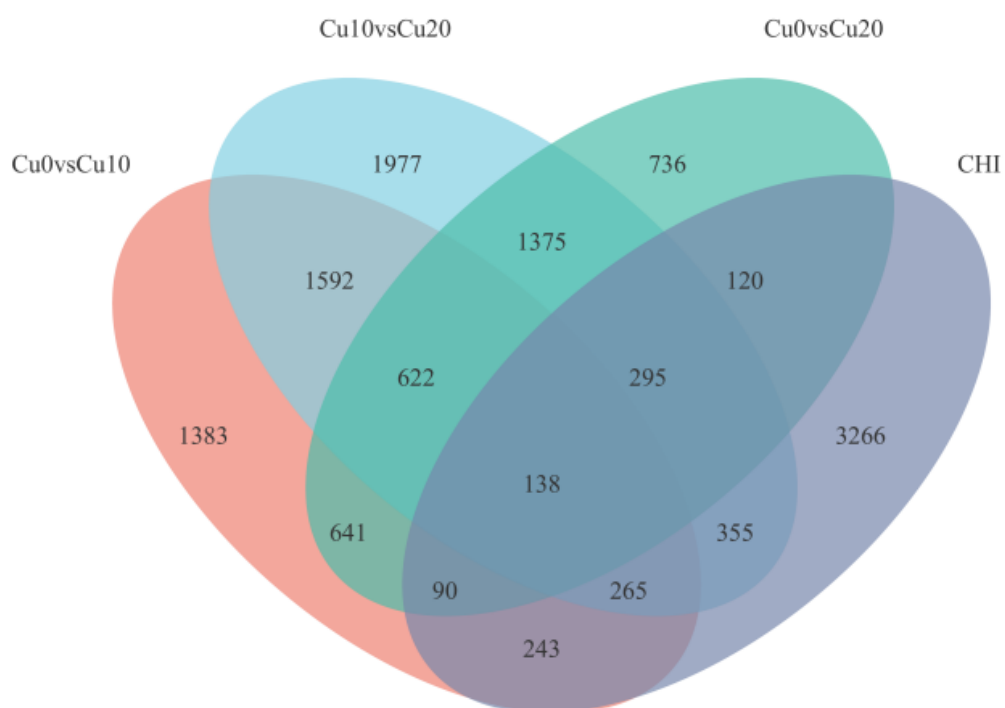

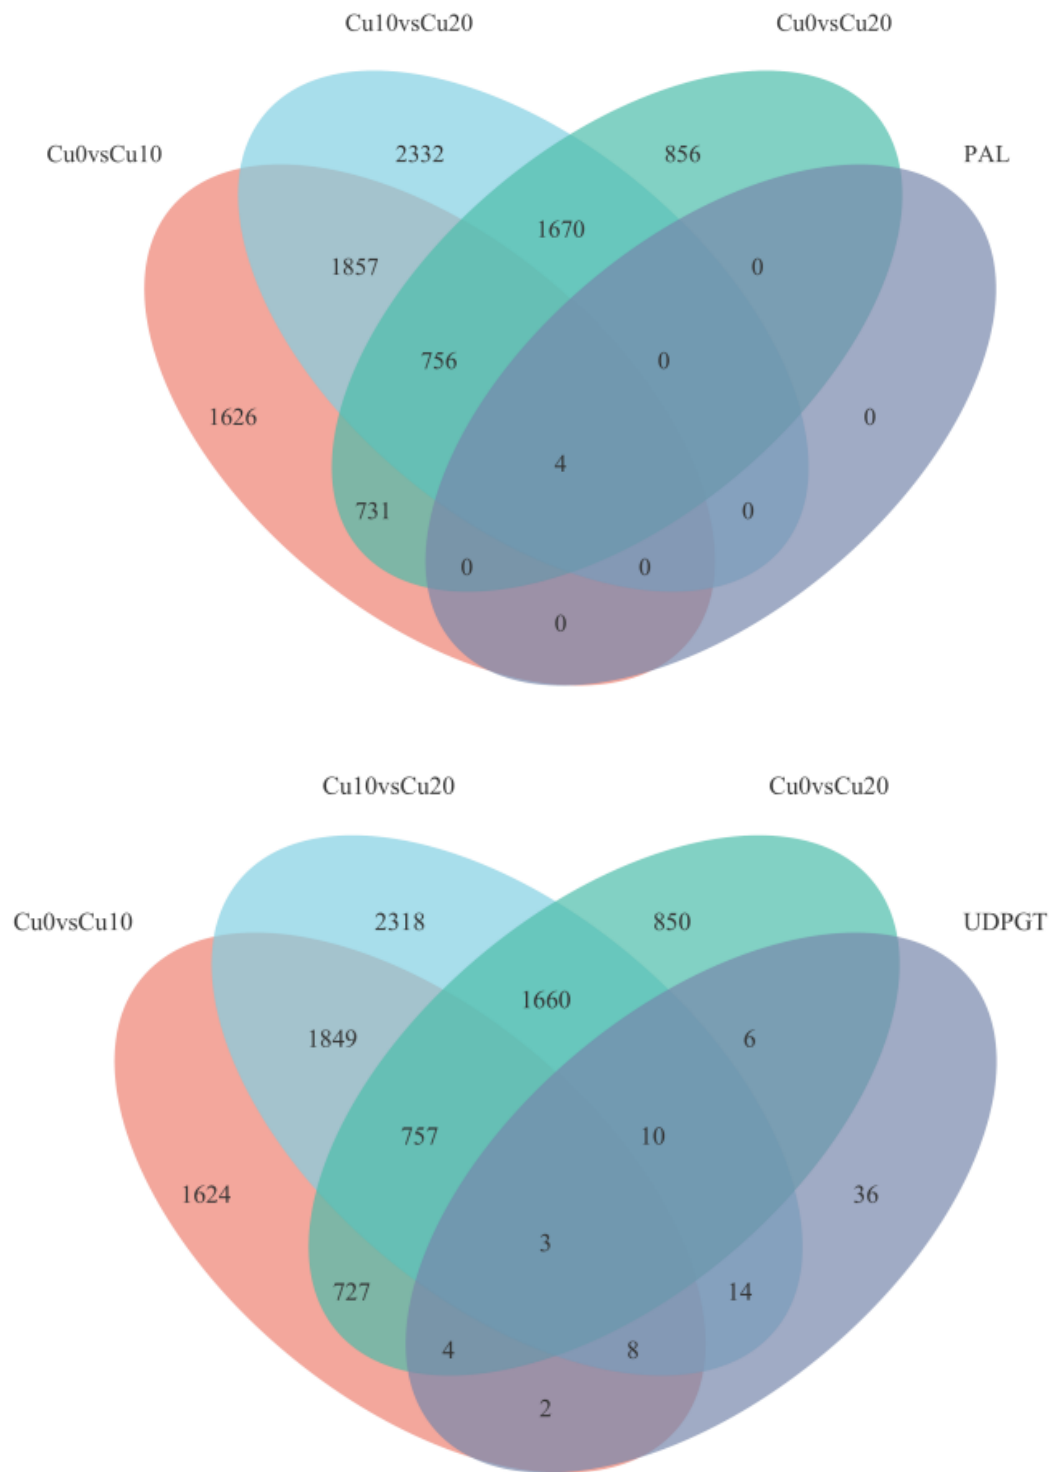

(a)

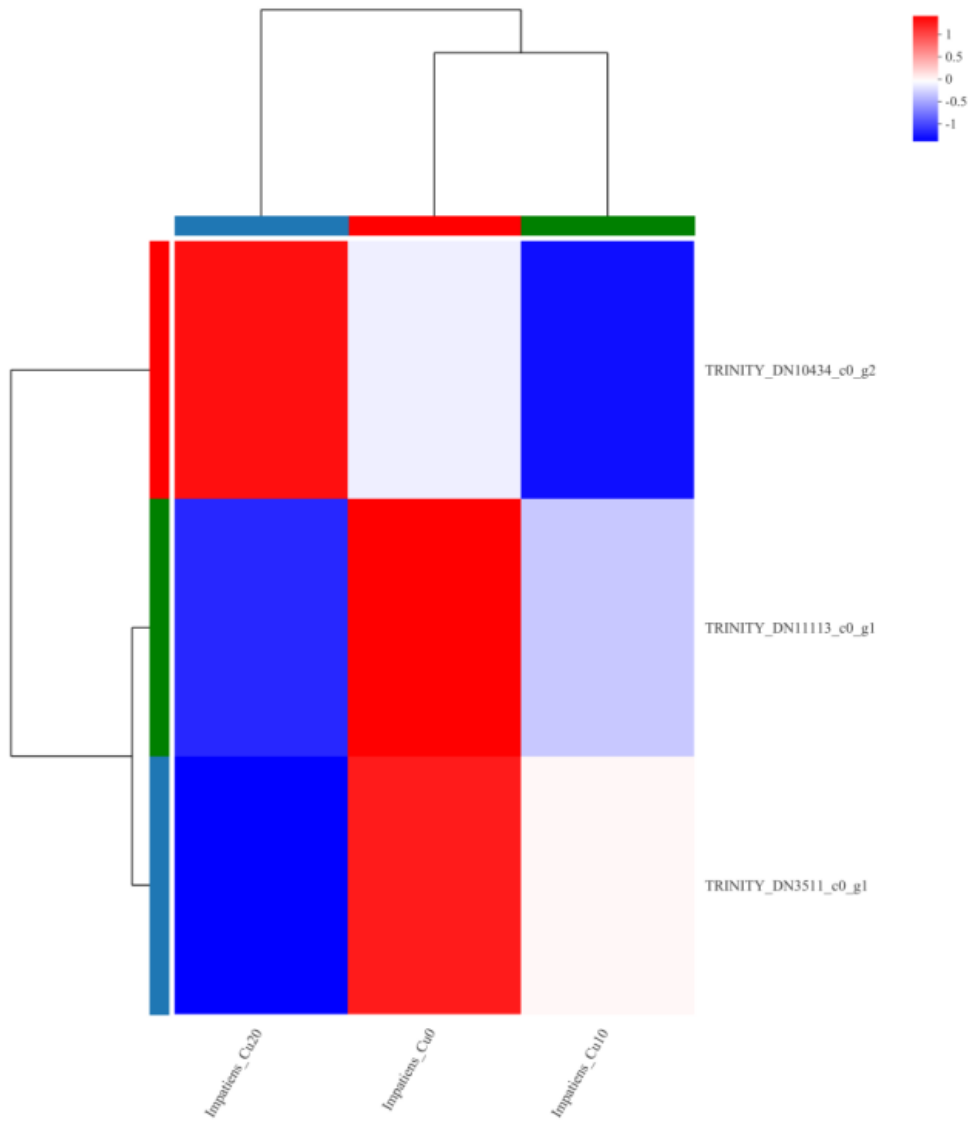

(b)

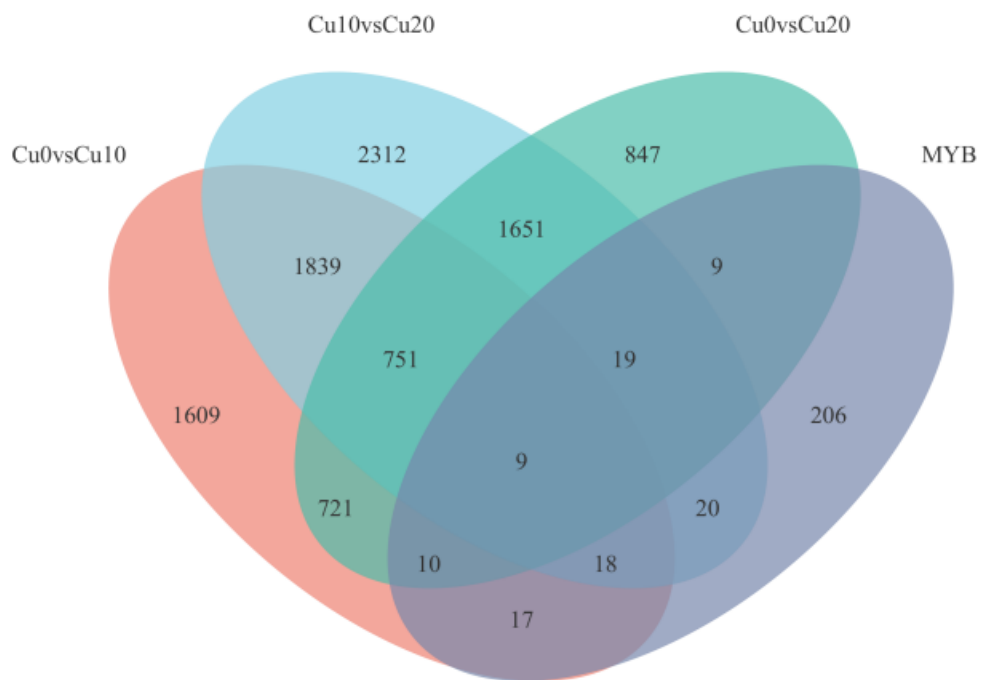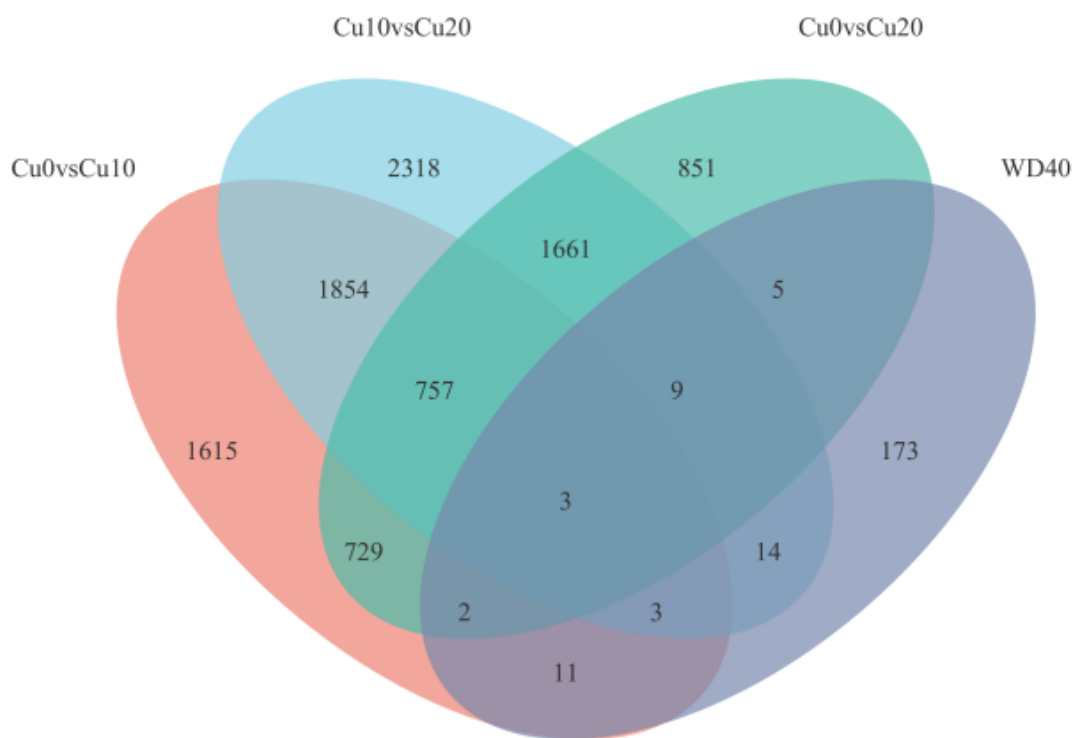

(c)

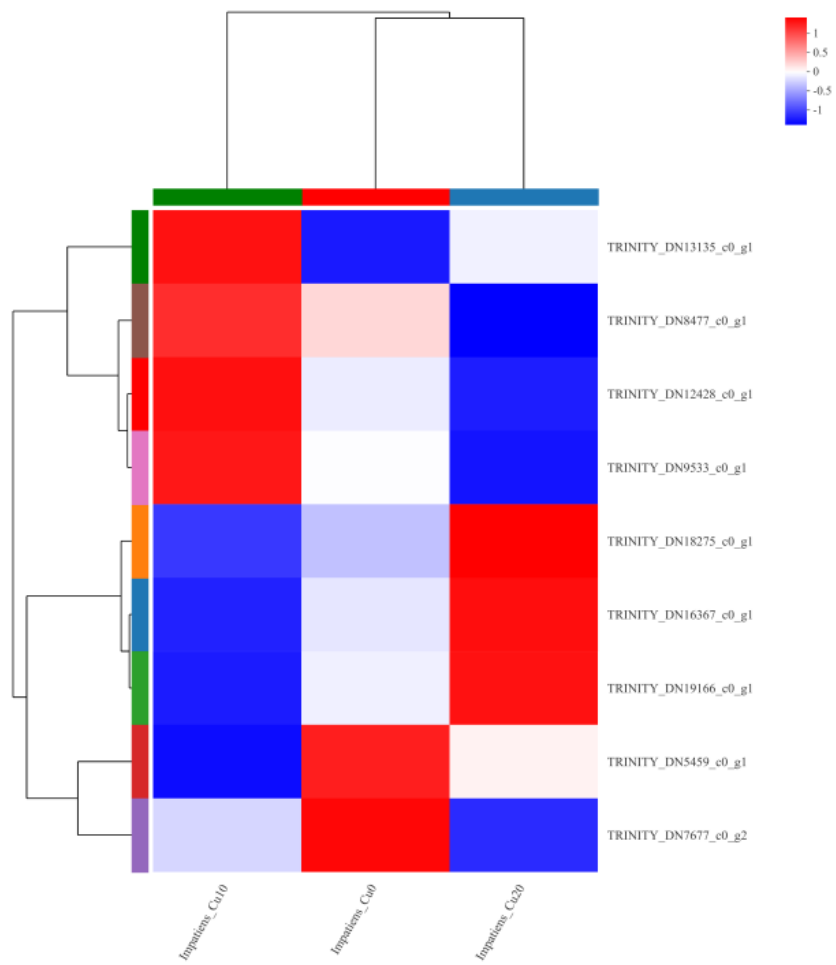

(d)

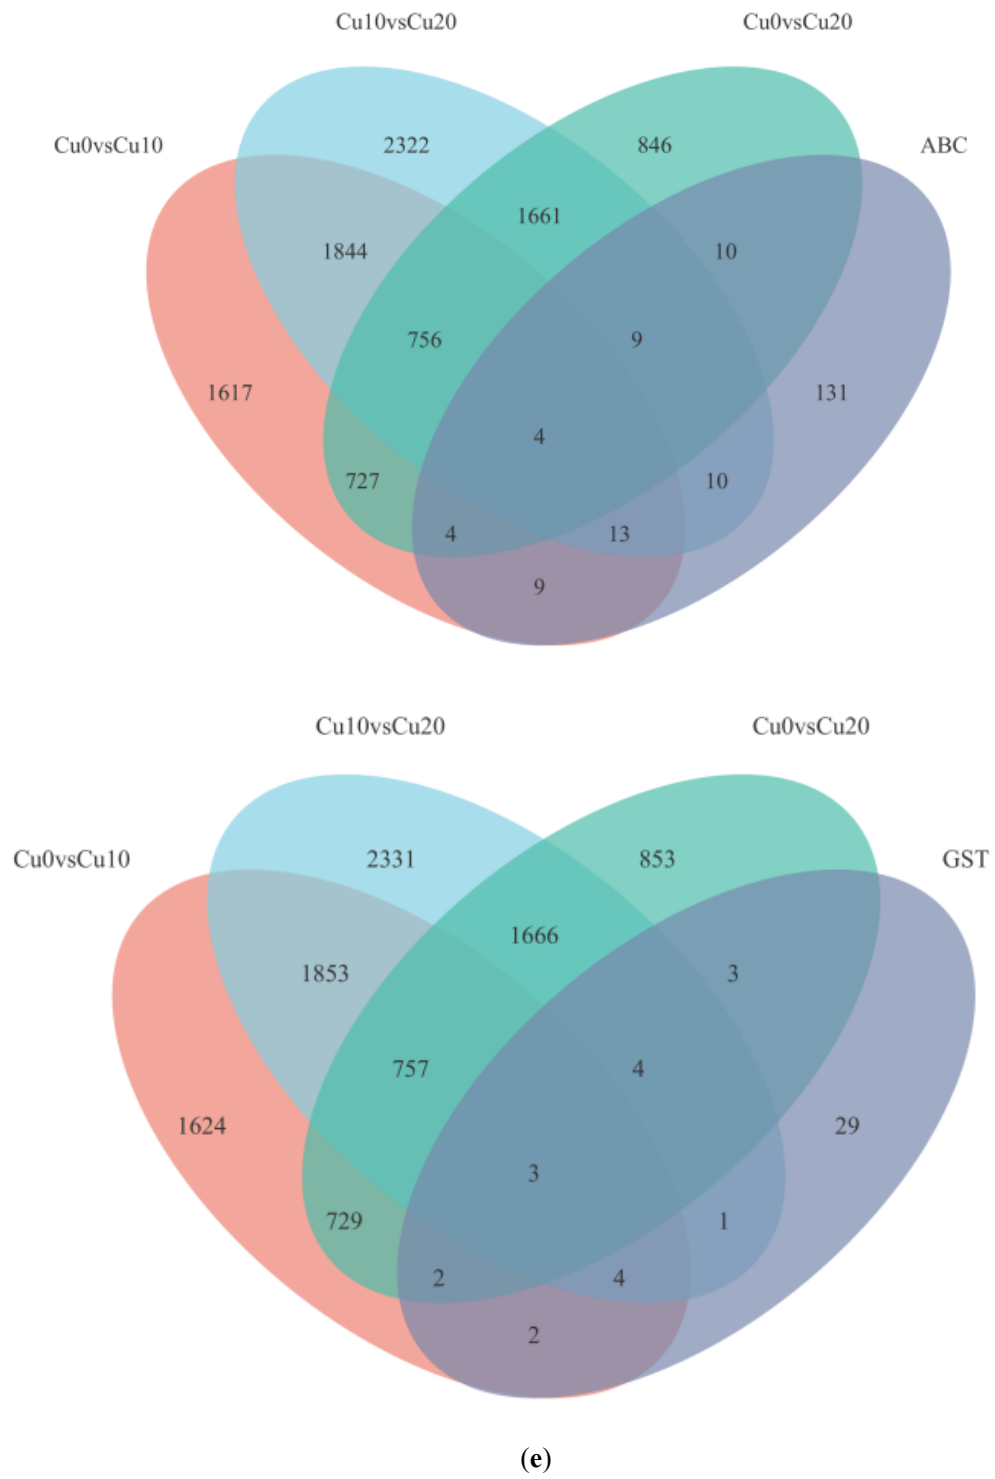

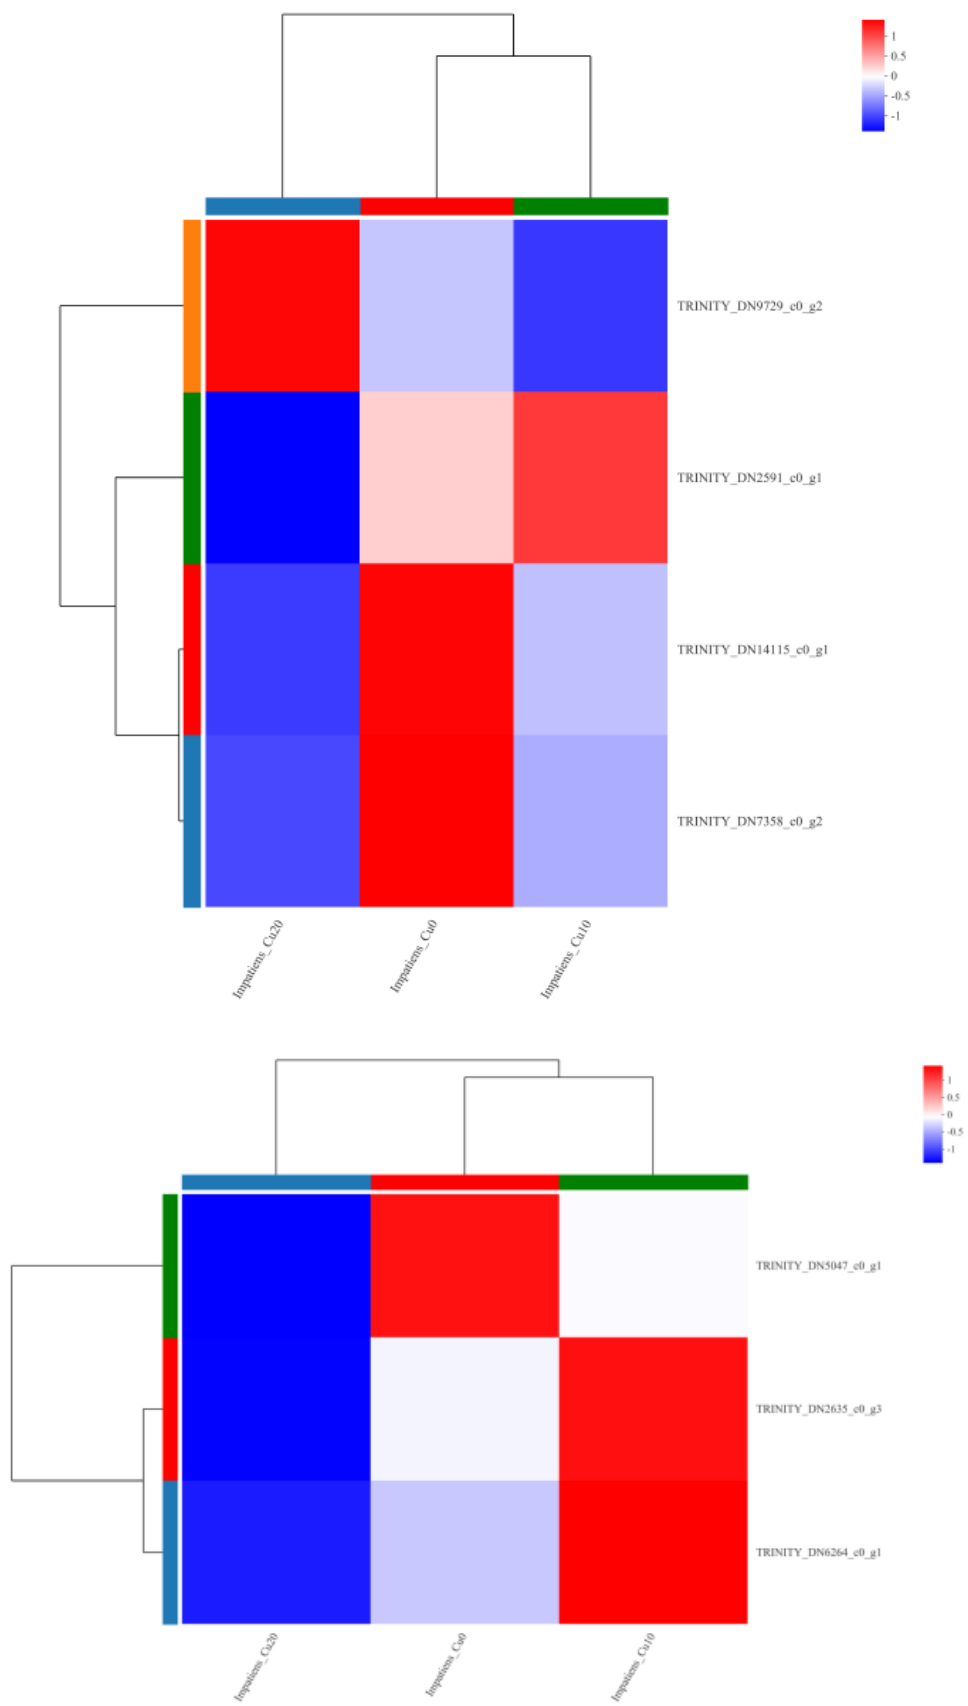

(f)

Figure S3. **(a)** Venn diagram of structural genes; **(b)** Differential expression of *GT* Unigenes; **(c)** Venn diagram of transcription factors; **(d)** Differential expression of *MYB* Unigenes; **(e)** Venn diagram of transport factors; **(f)** Differential expression of *ABC* and *GST* Unigenes
